# Supplementary material
Source: Springer Nature journal article supplement (https://www.springermedizin.de/resource/supplementary/13017_2010_174_MOESM3_ESM.pdf/9635624)

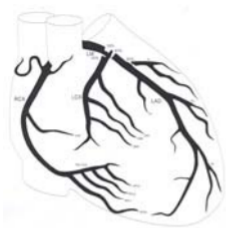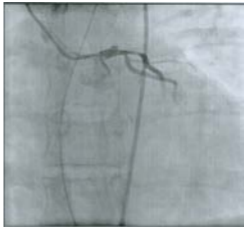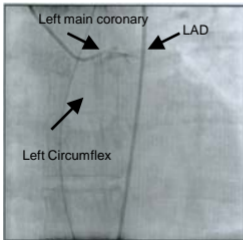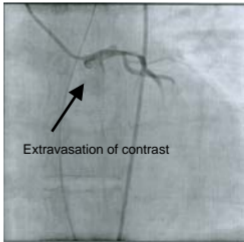

Supplement: MOESM3 [file 9635624]
